# Supplementary figures and images for: Highly selective Suzuki reaction catalysed by a molecular Pd–P-MOF catalyst under mild conditions: role of ligands and palladium speciation
Source: Royal Society of Chemistry journal article supplement (doi:10.1039/d1cy01351c), 2021-12-21

2 nm



Supplement: d1cy01351c3.pdf [file d1cy01351c3.pdf]
